# Supplementary material
Source: publisher site journal article supplement (https://www.dovepress.com/article/125058)
Supplement: Supplementary file 1 [file get_supplementary_file.php]

**Table:** List of Asian participating centers, ethics committees/institutional review boards in the FLAME study

| Country | Center/site number | Ethics committee/IRB name                                                                | Ethics committee/IRB department | City      |
|---------|--------------------|------------------------------------------------------------------------------------------|---------------------------------|-----------|
| CHINA   | 4300               | Ethical Committee of the First Affiliated Hospital of Guangzhou Medical University       | NR                              | Guangzhou |
| CHINA   | 4302               | Ethical Committee of the First Affiliated Hospital of Chinese PLA General Hospital       | NR                              | Beijing   |
| CHINA   | 4301               | Ethical Committee of the General Hospital of Guangzhou Military Command of PLA           | NR                              | Guangzhou |
| CHINA   | 4303               | Ethical Committee of Beijing Friendship Hospital, Capital Medical University             | NR                              | Beijing   |
| CHINA   | 4304               | Ethical Committee of Peking Union Medical College Hospital                               | NR                              | Beijing   |
| CHINA   | 4305               | Ethical Committee of The Third Xiangya Hospital of Central South University              | NR                              | Changsha  |
| CHINA   | 4306               | Ethical Committee of West China Hospital of Sichuan University                           | NR                              | Chengdu   |
| CHINA   | 4307               | Ethical Committee of Southwest Hospital, the Third Military Medical University           | NR                              | Chongqing |
| CHINA   | 4308               | Ethical Committee of The Second Affiliated Hospital of Third Military Medical University | NR                              | Chongqing |
| CHINA   | 4309               | Ethical Committee of Hainan provincial people's Hospital                                 | NR                              | Haikou    |
| CHINA   | 4310               | Ethical Committee of Hangzhou First People's Hospital                                    | NR                              | Hangzhou  |
| CHINA   | 4312               | Ethical Committee of The Jiangxi Provincial People's Hospital                            | NR                              | Nanchang  |
| CHINA   | 4313               | Ethical Committee of The First Affiliated Hospital of Nanchang University                | NR                              | Nanchang  |
| CHINA   | 4315               | Ethical Committee of Shanghai Pulmonary Hospital                                         | NR                              | Shanghai  |

|           |                                            |                                                                                                        |                                |              |
|-----------|--------------------------------------------|--------------------------------------------------------------------------------------------------------|--------------------------------|--------------|
| CHINA     | 4316                                       | Ethical Committee of Ruijin Hospital Affiliated to Shanghai JiaoTong University School of Medicine     | NR                             | Shanghai     |
| CHINA     | 4317                                       | Ethical Committee of The General Hospital of Shenyang Military Region                                  | NR                             | Shenyang     |
| CHINA     | 4318                                       | Ethical Committee of The Second Hospital of Hebei Medical University                                   | NR                             | Shijiazhuang |
| CHINA     | 4320                                       | Ethical Committee of The First Affiliated Hospital of Soochow University                               | NR                             | Suzhou       |
| CHINA     | 4321                                       | Ethical Committee of The General Hospital Tianjin Medical University                                   | NR                             | Tianjin      |
| CHINA     | 4322                                       | Ethical Committee of The First Affiliated Hospital of the Fourth Military Medical University           | NR                             | Xi'an        |
| CHINA     | 4323                                       | Ethical Committee of Jiangsu Province Hospital                                                         | NR                             | Nanjing      |
| HONG KONG | 4761                                       | Joint Chinese University of Hong Kong- New territories East cluster Clinical Research Ethics Committee | NA                             | Hong Kong    |
| HONG KONG | 4762                                       | Kowloon West Cluster Research Ethics Committee                                                         | NA                             | Hong Kong    |
| JAPAN     | 1009;#1011;<br>#1014;<br>#1020;#1006;#1012 | National Hospital Organization CRB                                                                     | National Hospital Organization | Meguro-ku    |
| JAPAN     | 1000                                       | Nihon Koukan Hospital IRB                                                                              | Nihon Koukan Hospital          | Kawasaki     |
| JAPAN     | 1001                                       | Tokyo-Eki Center-building Clinic IRB                                                                   | NR                             | Chuo-ku      |
| JAPAN     | 1002                                       | Nakatani Hospital IRB                                                                                  | NR                             | Himeji       |
| JAPAN     | 1003                                       | JCHO Hokkaido Hospital IRB                                                                             | NR                             | Sapporo      |
| JAPAN     | 1004                                       | Tenryu Hospital IRB                                                                                    | NR                             | Hamamatsu    |
| JAPAN     | 1005                                       | Kishiwada City Hospital IRB                                                                            | NR                             | Kishiwada    |

|                   |      |                                          |                                            |                     |
|-------------------|------|------------------------------------------|--------------------------------------------|---------------------|
| JAPAN             | 1007 | Sakaide City Hospital IRB                | NR                                         | Sakaide             |
| JAPAN             | 1008 | Hamamatsu Rosai Hospital IRB             | NR                                         | Hamamatsu           |
| JAPAN             | 1010 | Matsusaka City Hospital IRB              | NR                                         | Matsusaka           |
| JAPAN             | 1013 | Tosei General Hospital IRB               | NR                                         | Seto                |
| JAPAN             | 1015 | Obihiro Kokyukika Naika Hospital IRB     | NR                                         | Obihiro             |
| JAPAN             | 1016 | Iwata City Hospital IRB                  | NR                                         | Iwata               |
| JAPAN             | 1017 | Takamatsu Manicipal Hospital IRB         | NR                                         | Takamatsu           |
| JAPAN             | 1018 | Daido Hospital IRB                       | NR                                         | Nagoya              |
| JAPAN             | 1019 | Nagata Hospital IRB                      | NR                                         | Yanagawa            |
| JAPAN             | 1021 | Harasanshin Hospital IRB                 | NR                                         | Fukuoka             |
| JAPAN             | 1022 | Tohoku University Hospital IRB           | NR                                         | Sendai              |
| JAPAN             | 1023 | Nihon University Hospitals' Joint IRB    | Nihon University<br>Hospitals              | Itabashi-ku         |
| JAPAN             | 1024 | Juntendo University Hospitals IRB        | NR                                         | Bunkyo-ku           |
| JAPAN             | 1025 | Hokkaido University Hospital IRB         | NR                                         | Sapporo             |
| JAPAN             | 1026 | Fujita Health University hospital IRB    | NR                                         | Toyoake             |
| JAPAN             | 1027 | Kyoto University Hospital IRB            | NR                                         | Kyoto               |
| JAPAN             | 1028 | ICR Clinical Research Tokyo Hospital IRB | ICR Clinical<br>Research Tokyo<br>Hospital | Shinjuku-ku         |
| JAPAN             | 1029 | Kimura Hospital IRB                      | Kimura Hospital                            | Ota-ku              |
| PHILIPPINES       | 1380 | Lung Center of the Philippines           | Institutional Ethics<br>Review Board       | Quezon City         |
| PHILIPPINES       | 1381 | University of the Philippines Manila     | Research Ethics<br>Board                   | Manila              |
| PHILIPPINES       | 1382 | Mary Mediatrix Medical Center            | Research Ethics<br>Committee               | Batangas, Lipa City |
| REPUBLIC OF KOREA | 1205 | Kyunghee University Medical Center       | IRB                                        | Seoul               |

|                   |      |                                                                    |                                            |                |
|-------------------|------|--------------------------------------------------------------------|--------------------------------------------|----------------|
| REPUBLIC OF KOREA | 1207 | Seoul National University Hospital                                 | IRB                                        | Seoul          |
| REPUBLIC OF KOREA | 1200 | Korea University Anam Hospital                                     | IRB                                        | Seoul          |
| REPUBLIC OF KOREA | 1202 | The Catholic University of Korea Seoul St. Mary's Hospital         | IRB                                        | Seoul          |
| REPUBLIC OF KOREA | 1203 | Chungang University Hospital                                       | IRB                                        | Seoul          |
| REPUBLIC OF KOREA | 1204 | Soonchunhyang University Hospital_Bucheon                          | IRB                                        | Gyeonggi-do    |
| REPUBLIC OF KOREA | 1201 | The Catholic University of St Paul's Hospital                      | IRB                                        | Seoul          |
| REPUBLIC OF KOREA | 1206 | The Catholic University of Korea Incheon St. Mary's Hospital       | IRB                                        | Incheon        |
| REPUBLIC OF KOREA | 1209 | Chonbuk National University Hospital                               | IRB                                        | Chonbuk        |
| TAIWAN            | 1670 | Institutional Review Board                                         | Taipei Veterans General Hospital           | Taipei         |
| TAIWAN            | 1671 | Research Ethics Committee                                          | National Taiwan University Hospital        | Taipei         |
| TAIWAN            | 1672 | Research Ethics Review Committee                                   | Far Eastern Memorial Hospital              | Taipei         |
| TAIWAN            | 1673 | Research Ethics Committee                                          | China Medical University Hospital          | Taichung       |
| TAIWAN            | 1674 | The Institution Review Board of Taichung Veterans General Hospital | Taichung Veterans General Hospital         | Taichung       |
| TAIWAN            | 1675 | Institutional Review Board                                         | Chang Gung Medical Foundation              | Taoyuan County |
| TAIWAN            | 1676 | Institutional Review Board                                         | National Cheng Kung University Hospital    | Tainan         |
| TAIWAN            | 1677 | Institutional Review Board                                         | Chang Gung Medical Foundation              | Taoyuan County |
| THAILAND          | 1751 | The Office of Human Research Ethics                                | Khon Kaen University                       | Khon Kaen      |
| THAILAND          | 1752 | Research Ethics Committee                                          | Faculty of Medicine, Chiang Mai University | Chiang Mai     |

|          |      |                               |                                                         |         |
|----------|------|-------------------------------|---------------------------------------------------------|---------|
| THAILAND | 1753 | The Research Ethics Committee | Faculty of Medicine,<br>Prince of Songkla<br>University | Songkla |
|----------|------|-------------------------------|---------------------------------------------------------|---------|

IRB, institutional review board; NA, not applicable; NR, not reported
